# Supplementary material for: Genome-Wide Association Analysis of Effective Tillers in Rice under Different Nitrogen Gradients
Source: MDPI journal article supplement (doi:10.3390/ijms25052969), 2024-03-04
Supplement: s1 [file s1]

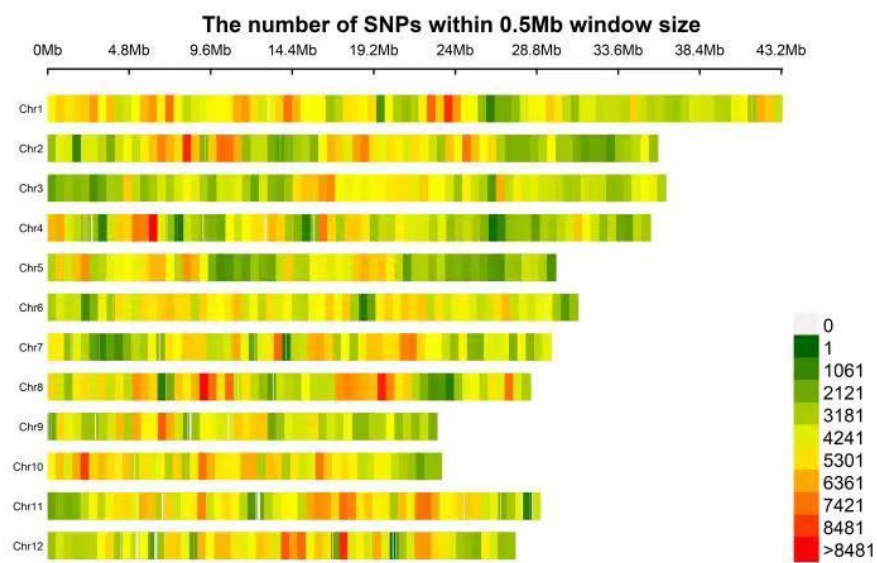

Figure S1. SNP density map for rice chromosomes.

2021

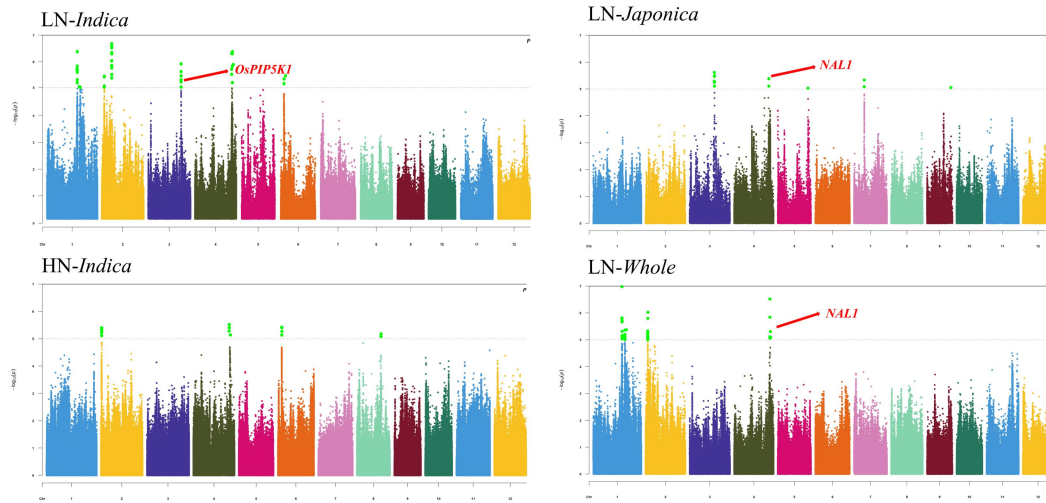

2022

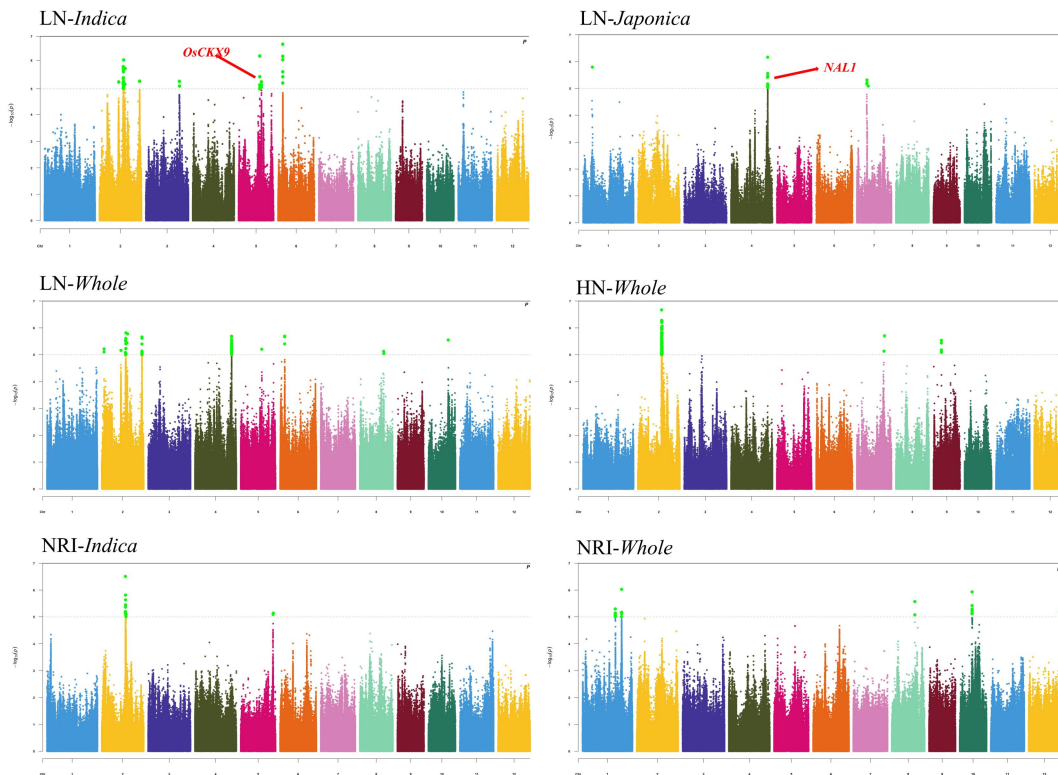

Figure S2. Manhattan map of genome-wide association analysis of rice ETN at different nitrogen levels

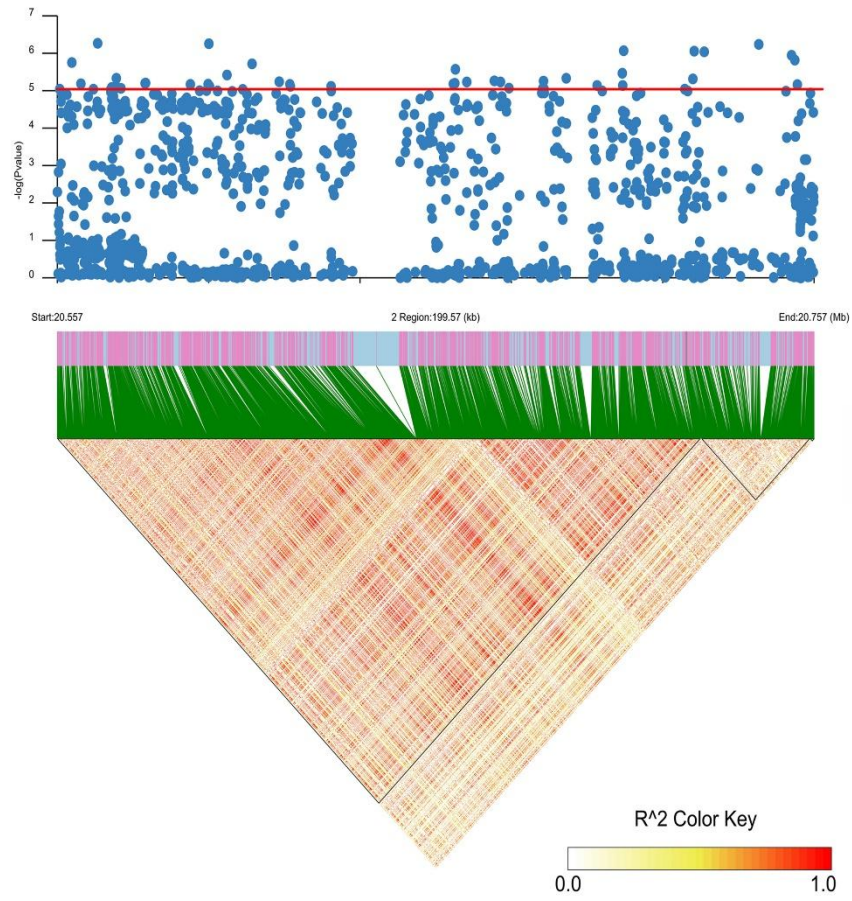

Figure S3. Regional Manhattan plots and linkage distribution (LD) heatmap of *Os02g0550300* and *Os02g0550700*.

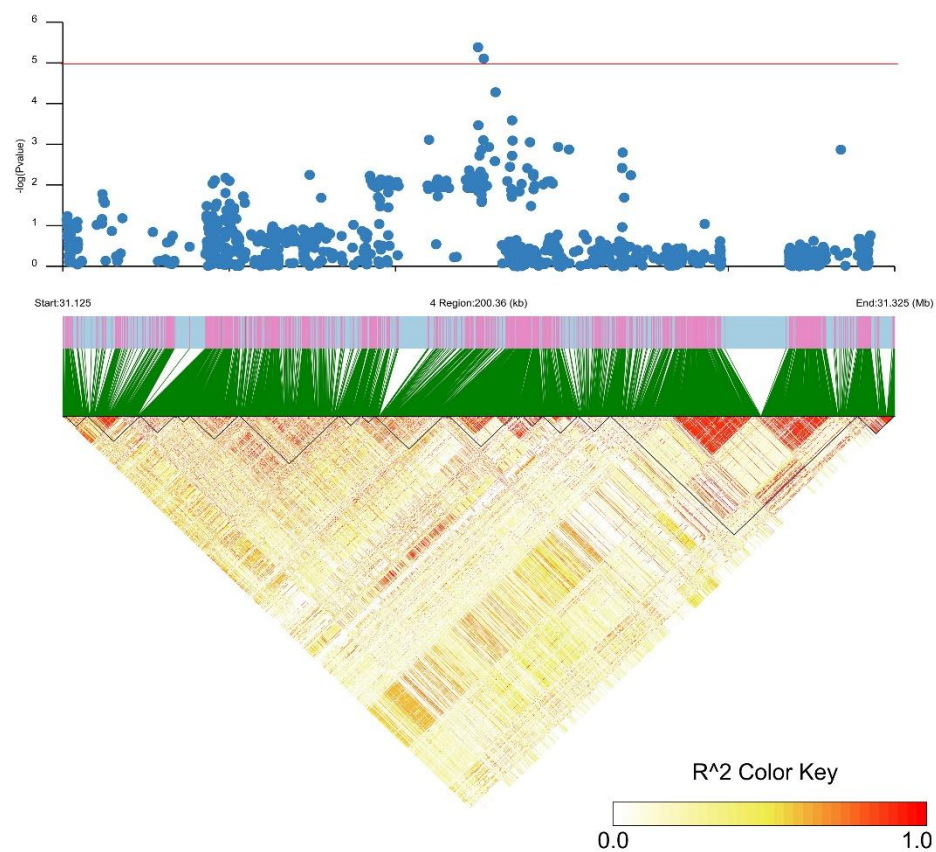

Figure S4. Regional Manhattan plots and linkage distribution (LD) heatmap of *Os04g0615700* and *Os04t06163000*.

2021

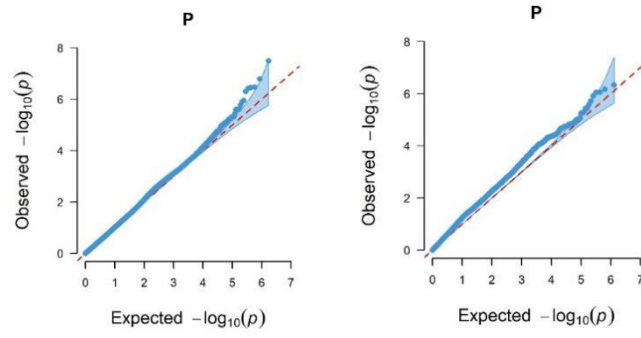

LN-Indica

LN-Japonica

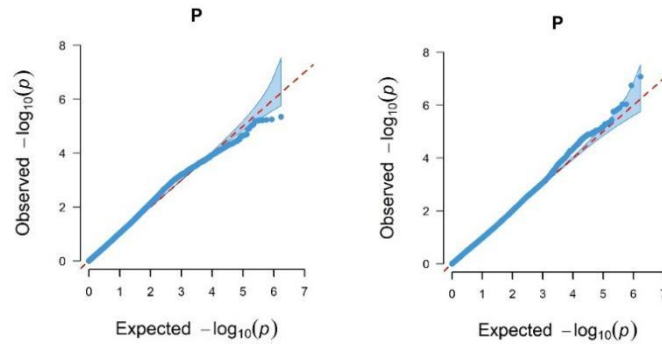

HN-Indica

LN-Whole

2022

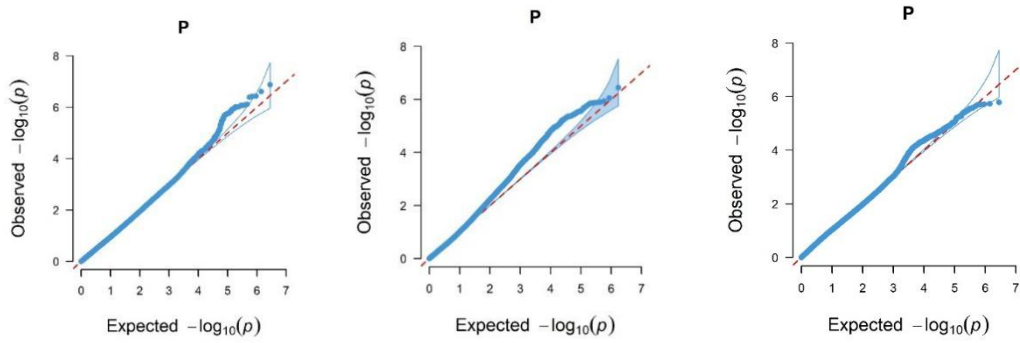

LN-Indica

LN-japonica

LN-Whole

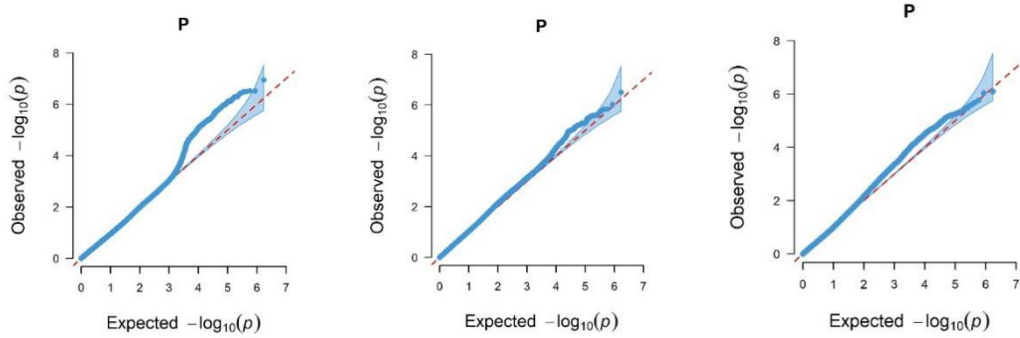

HN-Whole

NRI-Indica

NRI-Whole

Figure S5. Quantile-quantile plots for GWAS of effective tillering number
